# Supplementary material for: Identification of Water Contamination Sources Using Hydrochemical and Isotopic Studies—The Kozłowa Góra Reservoir Catchment Area (Southern Poland)
Source: MDPI journal article supplement (doi:10.3390/w14060846), 2022-03-08
Supplement: s1 [file s1]

*Supplementary material*

## **Identification of water contamination sources using hydrochemical and isotopic studies - the Kozłowa Góra reservoir catchment (Southern Poland)**

**Table S1.** Methods used in measurements of parameters.

**Table S2.** The results of physicochemical parameters in sampled water.

**Table S3.** The results of chemical analyses of sampled water.

**Table S4.** The results of nitrogen compound analyses in sampled water.

**Table S5.** The results of isotopic analyses of S and O in  $\text{SO}_4$  in sampled water.

**Table S1.** Methods used in measurements of parameters.

| Parameter                                                            | Method/Equipment                                                                       | Precision    | Detection limit/Range |
|----------------------------------------------------------------------|----------------------------------------------------------------------------------------|--------------|-----------------------|
| T                                                                    | ELMETRON CP-401                                                                        | ± 0.1 °C     | -50.0 – 199.9 °C      |
| pH                                                                   | ELMETRON CP-401                                                                        | ± 0.002      | -6.000 – 20.000       |
| EC                                                                   | ELMETRON CC-411                                                                        | ± 0.25%      | 0 – 199.9 mS/cm       |
| Eh                                                                   | ELMETRON CP-315                                                                        | ± 1 mV       | ± 1,200 mV            |
| O <sub>2</sub>                                                       | WTW Oxi 315i                                                                           | ± 0.5%       | 0.00 – 19.99 mg/L     |
| Ca <sup>2+</sup>                                                     | Inductively Coupled Plasma Optical Emission Spectrometry (ICP-OES)                     | ± 10%        | 0.010 – 1,000 mg/L    |
| Mg <sup>2+</sup>                                                     | Inductively Coupled Plasma Optical Emission Spectrometry (ICP-OES)                     | ± 10%        | 0.0070 – 1,000 mg/L   |
| Na <sup>+</sup>                                                      | Inductively Coupled Plasma Optical Emission Spectrometry (ICP-OES)                     | ± 10%        | 1.0 – 1,000 mg/L      |
| K <sup>+</sup>                                                       | Inductively Coupled Plasma Optical Emission Spectrometry (ICP-OES)                     | ± 10%        | 1.0 – 1,000 mg/L      |
| HCO <sub>3</sub> <sup>-</sup>                                        | Titration to the phenolphthalein indicator endpoint                                    | ± 10%        | 12 – 6,100 mg/L       |
| SO <sub>4</sub> <sup>2-</sup>                                        | Gravimetric determination in hydrated barium chloride                                  | ± 20%        | 10 – 5,000 mg/L       |
| Cl <sup>-</sup>                                                      | Titration with silver nitrate solution in the presence of potassium chromate indicator | ± 15%        | 5.0 – 50,000 mg/L     |
| PO <sub>4</sub> <sup>3-</sup>                                        | Ammonium molybdate spectrometric method                                                | ± 15%        | 0.05 – 200 mg/L       |
| TOC                                                                  | High-temperature combustion and infrared (IR) detection                                | ± 18%        | 2.0 – 1,000 mg/L      |
| N-NO <sub>3</sub> <sup>-</sup>                                       | HACH DR1900 (Cadmium Reduction Method)                                                 | ± 0.3 mg/L   | 0.3 – 30.0 mg/L       |
| N-NO <sub>2</sub> <sup>-</sup>                                       | HACH DR1900 (USEPA Diazotization Method)                                               | ± 0.002 mg/L | 0.002 – 0.300 mg/L    |
| N-NH <sub>4</sub> <sup>+</sup>                                       | HACH DR1900 (Salicylate Method)                                                        | ± 0.004 mg/L | 0.01 – 0.50 mg/L      |
| δ <sup>34</sup> S <sub>SO4</sub><br>δ <sup>18</sup> O <sub>SO4</sub> | Elemental analysis isotope ratio mass spectrometry (EA-IRMS)                           | ± 0.08 ‰     | -                     |

**Table S2.** The results of physicochemical parameters in sampled water (Date: I – June 2020; II – January 2021; III – June 2021; IV – September 2021).

| Parameter                     | T    |     |      |      | pH   |      |      |      | EC    |      |      |      | Eh  |     |     |     | O <sub>2</sub> |       |      |      | O <sub>2</sub> |      |       |      |
|-------------------------------|------|-----|------|------|------|------|------|------|-------|------|------|------|-----|-----|-----|-----|----------------|-------|------|------|----------------|------|-------|------|
| Unit                          | °C   |     |      |      | -    |      |      |      | µS/cm |      |      |      | mV  |     |     |     | mg/L           |       |      |      | %              |      |       |      |
| Date                          | I    | II  | III  | IV   | I    | II   | III  | IV   | I     | II   | III  | IV   | I   | II  | III | IV  | I              | II    | III  | IV   | I              | II   | III   | IV   |
| <b>BRYNICA RIVER</b>          |      |     |      |      |      |      |      |      |       |      |      |      |     |     |     |     |                |       |      |      |                |      |       |      |
| <b>R1</b>                     | -    | -   | -    | 12.3 | -    | -    | -    | 7.75 | -     | -    | -    | 606  | -   | -   | -   | 34  | -              | -     | -    | 5.65 | -              | -    | -     | 54.7 |
| <b>R2</b>                     | 16.6 | 1.0 | 15.5 | 11.8 | 6.96 | 7.25 | 7.59 | 7.14 | 412   | 533  | 445  | 484  | 206 | 147 | 134 | 112 | 6.11           | 10.50 | 2.84 | 5.59 | 65.5           | 78.4 | 81.2  | 53.2 |
| <b>R3</b>                     | 16.0 | 3.0 | 15.7 | 9.8  | 7.40 | 7.51 | 7.11 | 7.35 | 448   | 545  | 478  | 496  | 205 | 57  | 122 | 85  | 7.36           | 8.50  | 8.75 | 5.38 | 78.0           | 66.7 | 91.8  | 48.8 |
| <b>R4</b>                     | 17.8 | 3.4 | 16.5 | 11.1 | 7.22 | 7.67 | 7.31 | 7.68 | 374   | 541  | 753  | 559  | 136 | 108 | 132 | 94  | 8.2            | 8.53  | 8.00 | 5.91 | 90.1           | 67.5 | 85.5  | 56.1 |
| <b>R5</b>                     | -    | 4.0 | 16.7 | 11.0 | -    | 7.52 | 7.41 | 7.68 | -     | 742  | 689  | 585  | -   | 116 | 118 | 92  | -              | 7.71  | 8.65 | 6.11 | -              | 62.4 | 92.6  | 57.1 |
| <b>R6</b>                     | 15.1 | 3.2 | 16.3 | 9.2  | 7.26 | 7.32 | 7.62 | 7.47 | 476   | 638  | 532  | 532  | 201 | 87  | 127 | 73  | 8.08           | 7.76  | 8.35 | 5.14 | 83.6           | 61.1 | 88.3  | 46.0 |
| <b>STREAMS</b>                |      |     |      |      |      |      |      |      |       |      |      |      |     |     |     |     |                |       |      |      |                |      |       |      |
| <b>S1</b>                     | -    | -   | -    | 11.2 | -    | -    | -    | 6.55 | -     | -    | -    | 268  | -   | -   | -   | 19  | -              | -     | -    | 3.14 | -              | -    | -     | 29.6 |
| <b>S2</b>                     | 15.7 | 2.6 | 16.9 | 11.8 | 6.93 | 7.12 | 7.11 | 7.01 | 331   | 227  | 271  | 302  | 151 | 108 | 136 | 82  | 4.81           | 8.27  | 5.33 | 3.6  | 49.9           | 63.5 | 56.8  | 34.3 |
| <b>S3</b>                     | -    | -   | -    | 12.7 | -    | -    | -    | 7.58 | -     | -    | -    | 602  | -   | -   | -   | 74  | -              | -     | -    | 5.82 | -              | -    | -     | 56.3 |
| <b>S4</b>                     | 16.0 | 4.5 | 16.3 | 12.5 | 7.42 | 7.33 | 7.48 | 7.62 | 540   | 848  | 625  | 684  | 183 | 48  | 11  | -40 | 7.06           | 7.08  | 8.15 | 5.47 | 74.4           | 58.1 | 86.5  | 52.8 |
| <b>S5</b>                     | -    | -   | -    | 11.5 | -    | -    | -    | 7.01 | -     | -    | -    | 368  | -   | -   | -   | -6  | -              | -     | -    | 4.26 | -              | -    | -     | 40.3 |
| <b>S6</b>                     | 13.8 | 5.8 | 14.5 | 11.2 | 7.34 | 7.50 | 7.47 | 7.51 | 543   | 628  | 642  | 599  | 43  | -31 | 116 | -15 | 9.17           | 7.20  | 9.3  | 5.34 | 93.9           | 60.5 | 93.7  | 50.1 |
| <b>S7</b>                     | 17.1 | 4.3 | 18.8 | 12.7 | 7.26 | 7.35 | 7.35 | 7.32 | 321   | 930  | 755  | 778  | -12 | -59 | -86 | -93 | 7.92           | 8.06  | 7.88 | 4.91 | 86.3           | 64.4 | 87.8  | 47.7 |
| <b>S8</b>                     | -    | -   | -    | 8.1  | -    | -    | -    | 6.67 | -     | -    | -    | 588  | -   | -   | -   | 78  | -              | -     | -    | 3.97 | -              | -    | -     | 34.6 |
| <b>S9</b>                     | 17.6 | 4.5 | 16.0 | 10.8 | 7.26 | 7.69 | 7.64 | 7.71 | 404   | 946  | 700  | 685  | 151 | 113 | 117 | 102 | 7.4            | 7.85  | 8.14 | 6.15 | 91.4           | 64.4 | 86.0  | 57.6 |
| <b>S10</b>                    | -    | -   | -    | 11.6 | -    | -    | -    | 7.94 | -     | -    | -    | 1010 | -   | -   | -   | 113 | -              | -     | -    | 2.60 | -              | -    | -     | 24.5 |
| <b>S11</b>                    | 16.8 | 4.1 | 17.1 | 7.8  | 6.95 | 6.84 | 6.75 | 6.98 | 237   | 210  | 223  | 225  | -12 | 100 | 77  | 35  | 5.85           | 6.64  | 5.8  | 3.73 | 63.1           | 52.9 | 61.7  | 32.2 |
| <b>KOZŁOWA GÓRA RESERVOIR</b> |      |     |      |      |      |      |      |      |       |      |      |      |     |     |     |     |                |       |      |      |                |      |       |      |
| <b>Z1</b>                     | 20.8 | 0.5 | 24.6 | 13.6 | 7.86 | 7.29 | 8.88 | 8.38 | 427   | 460  | 408  | 335  | 189 | 143 | 94  | 125 | 8.45           | 9.70  | 9.27 | 6.27 | 98.4           | 70.4 | 114.0 | 61.5 |
| <b>Z2</b>                     | 20.8 | 3.0 | 23.9 | 14.2 | 8.03 | 6.58 | 8.66 | 8.54 | 414   | 428  | 404  | 379  | 181 | 171 | 101 | 121 | 8.80           | 9.27  | 9.79 | 6.49 | 102.3          | 72.5 | 112.6 | 65.1 |
| <b>Z3</b>                     | -    | 0.7 | 23.9 | -    | -    | 7.59 | 8.66 | -    | -     | 373  | 410  | -    | -   | 90  | 114 | -   | -              | 10.10 | 8.61 | -    | -              | 78.0 | 106.0 | -    |
| <b>GROUNDWATER</b>            |      |     |      |      |      |      |      |      |       |      |      |      |     |     |     |     |                |       |      |      |                |      |       |      |
| <b>W1</b>                     | 13.2 | 6.8 | 11.7 | 13.5 | 6.37 | 6.99 | 7.28 | 6.65 | 182   | 222  | 253  | 263  | 238 | 166 | 112 | 135 | 6.66           | 7.08  | 6.8  | 5.22 | 97.2           | 61.6 | 65.3  | 51.5 |
| <b>W2</b>                     | 11.0 | 8.0 | 10.5 | 13.8 | 6.86 | 7.27 | 7.24 | 7.07 | 452   | 346  | 334  | 405  | 82  | 79  | 92  | -13 | 5.29           | 7.35  | 7.79 | 4.86 | 50.2           | 65.7 | 72.8  | 48.2 |
| <b>W3</b>                     | -    | 7.5 | 13.1 | 14.6 | -    | 7.61 | 7.45 | 7.57 | -     | 673  | 514  | 598  | -   | 124 | 86  | 84  | -              | 5.77  | 4.09 | 4.26 | -              | 50.5 | 40.6  | 43.2 |
| <b>W4</b>                     | -    | 8.3 | 11.7 | 11.5 | -    | 7.28 | 7.11 | 7.06 | -     | 1500 | 1650 | 1290 | -   | 77  | 109 | 84  | -              | 6.33  | 6.25 | 4.31 | -              | 56.5 | 59.1  | 40.6 |

**Table S3.** The results of chemical analyses of sampled water (Date: I – June 2020; II – January 2021; III – June 2021; IV – September 2021).

| Parameter              | Ca <sup>2+</sup> |     |     |     | Mg <sup>2+</sup> |     |     |     | Na <sup>+</sup> |     |     |     | K <sup>+</sup> |     |     |     | HCO <sub>3</sub> <sup>-</sup> |     |     |      | SO <sub>4</sub> <sup>2-</sup> |     |     |     | Cl <sup>-</sup> |     |     |     | PO <sub>4</sub> <sup>3-</sup> |       |       |       | TOC |     |     |     |
|------------------------|------------------|-----|-----|-----|------------------|-----|-----|-----|-----------------|-----|-----|-----|----------------|-----|-----|-----|-------------------------------|-----|-----|------|-------------------------------|-----|-----|-----|-----------------|-----|-----|-----|-------------------------------|-------|-------|-------|-----|-----|-----|-----|
| Unit                   | mg/L             |     |     |     | mg/L             |     |     |     | mg/L            |     |     |     | mg/L           |     |     |     | mg/L                          |     |     |      | mg/L                          |     |     |     | mg/L            |     |     |     | mg/L                          |       |       |       |     |     |     |     |
| Date                   | I                | II  | III | IV  | I                | II  | III | IV  | I               | II  | III | IV  | I              | II  | III | IV  | I                             | II  | III | IV   | I                             | II  | III | IV  | I               | II  | III | IV  | I                             | II    | III   | IV    | I   | II  | III | IV  |
| BRYNICA RIVER          |                  |     |     |     |                  |     |     |     |                 |     |     |     |                |     |     |     |                               |     |     |      |                               |     |     |     |                 |     |     |     |                               |       |       |       |     |     |     |     |
| R1                     | -                | -   | -   | 120 | -                | -   | -   | 4.1 | -               | -   | -   | 7.7 | -              | -   | -   | 2.1 | -                             | -   | -   | 291  | -                             | -   | -   | 46  | -               | -   | -   | 16  | -                             | -     | -     | <0.05 | -   | -   | -   | 4.5 |
| R2                     | 96               | 74  | 78  | 85  | 8.2              | 5.6 | 4.5 | 4.6 | 16              | 26  | 13  | 12  | 2.1            | 2.4 | 2.2 | 2.5 | 204                           | 156 | 187 | 209  | 31                            | 47  | 35  | 38  | 34              | 54  | 27  | 24  | <0.05                         | <0.05 | <0.05 | <0.05 | 9.8 | 9.3 | 9.5 | 7.4 |
| R3                     | 88               | 62  | 75  | 68  | 22               | 13  | 19  | 18  | 9.9             | 26  | 11  | 11  | 3.1            | 14  | 3.1 | 3.5 | 189                           | 147 | 169 | 177  | 64                            | 52  | 78  | 68  | 21              | 53  | 23  | 23  | <0.05                         | <0.05 | <0.05 | <0.05 | 5.5 | 22  | 8.6 | 7.7 |
| R4                     | 63               | 62  | 83  | 73  | 16               | 13  | 22  | 20  | 15              | 25  | 50  | 15  | 8.0            | 14  | 11  | 4.6 | 139                           | 124 | 204 | 187  | 50                            | 56  | 99  | 77  | 26              | 53  | 72  | 31  | 0.141                         | <0.05 | 0.06  | 0.11  | 8.1 | 20  | 10  | 7.7 |
| R5                     | -                | 69  | 75  | 76  | -                | 17  | 20  | 21  | -               | 52  | 37  | 19  | -              | 18  | 8.7 | 5.7 | -                             | 211 | 241 | 250  | -                             | 66  | 81  | 70  | -               | 84  | 54  | 32  | -                             | <0.05 | <0.05 | <0.05 | -   | -   | -   | -   |
| R6                     | 84               | 66  | 84  | 73  | 21               | 16  | 21  | 20  | 18              | 34  | 15  | 19  | 4.2            | 15  | 3.9 | 5.0 | 181                           | 172 | 181 | 187  | 69                            | 58  | 80  | 78  | 31              | 66  | 30  | 37  | 0.200                         | <0.05 | <0.05 | <0.05 | 4.2 | 16  | 7.5 | 6.7 |
| STREAMS                |                  |     |     |     |                  |     |     |     |                 |     |     |     |                |     |     |     |                               |     |     |      |                               |     |     |     |                 |     |     |     |                               |       |       |       |     |     |     |     |
| S1                     | -                | -   | -   | 36  | -                | -   | -   | 5.5 | -               | -   | -   | 14  | -              | -   | -   | 1.6 | -                             | -   | -   | 90.9 | -                             | -   | -   | 10  | -               | -   | -   | 30  | -                             | -     | -     | <0.05 | -   | -   | -   | 53  |
| S2                     | 65               | 32  | 38  | 41  | 21               | 9.6 | 12  | 13  | 5.3             | 5.2 | 6.5 | 5.9 | 1.5            | 1.8 | 1.6 | 2.2 | 206                           | 82  | 131 | 142  | <10                           | 33  | 14  | 13  | 6.7             | 10  | 8.0 | 9.0 | <0.05                         | <0.05 | <0.05 | <0.05 | 17  | 18  | 21  | 23  |
| S3                     | -                | -   | -   | 89  | -                | -   | -   | 34  | -               | -   | -   | 5.8 | -              | -   | -   | 3.6 | -                             | -   | -   | 300  | -                             | -   | -   | 74  | -               | -   | -   | 19  | -                             | -     | -     | 0.17  | -   | -   | -   | 3.9 |
| S4                     | 102              | 80  | 80  | 83  | 33               | 26  | 27  | 27  | 10              | 16  | 18  | 19  | 5.2            | 90  | 7.1 | 6.8 | 244                           | 300 | 223 | 220  | 78                            | 60  | 87  | 110 | 34              | 39  | 43  | 45  | <0.05                         | <0.05 | <0.05 | <0.05 | 4.5 | 63  | 7.5 | 7.7 |
| S5                     | -                | -   | -   | 46  | -                | -   | -   | 12  | -               | -   | -   | 8.5 | -              | -   | -   | 7.4 | -                             | -   | -   | 98   | -                             | -   | -   | 73  | -               | -   | -   | 15  | -                             | -     | -     | 0.12  | -   | -   | -   | 14  |
| S6                     | 99               | 88  | 86  | 80  | 38               | 32  | 34  | 32  | 8.7             | 9.3 | 11  | 10  | 2.8            | 2.9 | 2.6 | 2.8 | 272                           | 251 | 269 | 245  | 87                            | 105 | 93  | 90  | 17              | 17  | 19  | 18  | <0.05                         | <0.05 | <0.05 | <0.05 | 7.4 | 11  | 6.9 | 7.8 |
| S7                     | 60               | 93  | 98  | 95  | 22               | 28  | 38  | 36  | 4.6             | 42  | 9.7 | 14  | 9.9            | 89  | 8.1 | 22  | 171                           | 368 | 364 | 382  | 33                            | 69  | 100 | 85  | 7.8             | 45  | 20  | 19  | <0.05                         | <0.05 | <0.05 | <0.05 | 4.0 | 120 | 13  | 14  |
| S8                     | -                | -   | -   | 60  | -                | -   | -   | 16  | -               | -   | -   | 33  | -              | -   | -   | 3.8 | -                             | -   | -   | 59   | -                             | -   | -   | 100 | -               | -   | -   | 92  | -                             | -     | -     | 0.10  | -   | -   | -   | 6.5 |
| S9                     | 71               | 87  | 100 | 83  | 21               | 24  | 30  | 25  | 11              | 65  | 22  | 20  | 6.3            | 22  | 5.9 | 5.0 | 166                           | 240 | 214 | 219  | 58                            | 94  | 110 | 100 | 24              | 114 | 49  | 45  | 0.082                         | <0.05 | <0.05 | <0.05 | 7.9 | 24  | 7.0 | 5.4 |
| S10                    | -                | -   | -   | 73  | -                | -   | -   | 19  | -               | -   | -   | 58  | -              | -   | -   | 15  | -                             | -   | -   | 466  | -                             | -   | -   | 55  | -               | -   | -   | 83  | -                             | -     | -     | 12.5  | -   | -   | -   | 50  |
| S11                    | 51               | 31  | 35  | 27  | 11               | 6.3 | 7.4 | 5.7 | 4.2             | 4.8 | 5.8 | 5.6 | 1.1            | 1.7 | 1.7 | 1.7 | 111                           | 48  | 61  | 65   | 23                            | 110 | 43  | 33  | 8.9             | 9.3 | 9.0 | 9.0 | 0.086                         | <0.05 | 0.05  | <0.05 | 11  | 14  | 15  | 17  |
| KOZŁOWA GÓRA RESERVOIR |                  |     |     |     |                  |     |     |     |                 |     |     |     |                |     |     |     |                               |     |     |      |                               |     |     |     |                 |     |     |     |                               |       |       |       |     |     |     |     |
| Z1                     | 69               | 64  | 59  | 47  | 18               | 16  | 14  | 12  | 13              | 13  | 16  | 14  | 4.8            | 4.3 | 4.2 | 3.9 | 170                           | 165 | 128 | 129  | 50                            | 66  | 62  | 42  | 32              | 26  | 29  | 27  | <0.05                         | <0.05 | <0.05 | <0.05 | 10  | 10  | 12  | 10  |
| Z2                     | 78               | 62  | 63  | 45  | 20               | 15  | 14  | 12  | 14              | 12  | 15  | 13  | 5.3            | 4.2 | 4.0 | 3.8 | 171                           | 159 | 131 | 128  | 58                            | 62  | 59  | 40  | 32              | 25  | 29  | 27  | <0.05                         | <0.05 | <0.05 | <0.05 | 10  | 8.7 | 14  | 10  |
| Z3                     | 52               | 45  | 54  | -   | 13               | 11  | 12  | -   | 14              | 9.8 | 14  | -   | 5.2            | 3.6 | 3.8 | -   | 177                           | 119 | 171 | -    | 47                            | 56  | 46  | -   | 26              | 19  | 24  | -   | <0.05                         | <0.05 | <0.05 | -     | -   | -   | -   |     |
| GROUNDWATER            |                  |     |     |     |                  |     |     |     |                 |     |     |     |                |     |     |     |                               |     |     |      |                               |     |     |     |                 |     |     |     |                               |       |       |       |     |     |     |     |
| W1                     | 48               | 38  | 37  | 41  | 7.9              | 5.1 | 4.2 | 5.3 | 3.2             | 3.0 | 4.8 | 4.4 | 2.6            | 2.7 | 3.0 | 3.3 | 57                            | 78  | 75  | 78   | 21                            | 21  | 34  | 41  | <5              | <5  | 5   | <5  | <0.05                         | <0.05 | 0.098 | 0.08  | 8.2 | 11  | 9.5 | 9.8 |
| W2                     | 78               | 46  | 42  | 58  | 14               | 8.3 | 7.5 | 9.7 | 15              | 8.6 | 9.1 | 11  | 11             | 8.4 | 8.5 | 9.2 | 86                            | 67  | 63  | 65   | 80                            | 44  | 43  | 53  | 26              | 9.8 | 11  | 19  | <0.05                         | <0.05 | <0.05 | <0.05 | 2.2 | 5.8 | 4.4 | 5.0 |
| W3                     | 60               | 90  | 65  | 80  | 19               | 27  | 20  | 23  | 14              | 17  | 10  | 14  | 16             | 18  | 14  | 15  | 281                           | 375 | 281 | 336  | 53                            | 42  | 31  | 40  | <5              | 5.1 | <5  | <5  | <0.05                         | 1.496 | 1.385 | 3.200 | -   | -   | -   | -   |
| W4                     | 180              | 169 | 184 | 152 | 34               | 32  | 34  | 30  | 117             | 107 | 135 | 93  | 38             | 29  | 34  | 28  | 445                           | 427 | 592 | 505  | 104                           | 95  | 88  | 86  | 256             | 211 | 233 | 158 | <0.05                         | <0.05 | <0.05 | <0.05 | -   | -   | -   | -   |

**Table S4.** The results of nitrogen compound analyses in sampled water (Date: I – June 2020; II – January 2021; III – June 2021; IV – September 2021).

| Parameter                     | NO <sub>3</sub> <sup>-</sup> |      |      |      | NO <sub>2</sub> <sup>-</sup> |       |       |       | NH <sub>4</sub> <sup>+</sup> |       |       |       |
|-------------------------------|------------------------------|------|------|------|------------------------------|-------|-------|-------|------------------------------|-------|-------|-------|
| Unit                          | mg/L                         |      |      |      | mg/L                         |       |       |       | mg/L                         |       |       |       |
| Date                          | I                            | II   | III  | IV   | I                            | II    | III   | IV    | I                            | II    | III   | IV    |
| <b>BRYNICA RIVER</b>          |                              |      |      |      |                              |       |       |       |                              |       |       |       |
| <b>R1</b>                     | -                            | -    | -    | 12.8 | -                            | -     | -     | 0.030 | -                            | -     | -     | 0.03  |
| <b>R2</b>                     | 0.9                          | 8.0  | 4.0  | 5.8  | -                            | 0.036 | 0.023 | 0.010 | 0.06                         | 0.26  | 0.08  | 0.03  |
| <b>R3</b>                     | 6.2                          | 6.2  | 8.0  | 7.5  | -                            | 0.043 | 0.046 | 0.020 | 0.06                         | 0.06  | 0.04  | <0.01 |
| <b>R4</b>                     | 8.0                          | 7.5  | 6.2  | 9.3  | -                            | 0.046 | 0.394 | 0.020 | 0.64                         | 0.03  | 0.85  | <0.01 |
| <b>R5</b>                     | -                            | 8.0  | -    | 10.2 | -                            | 0.125 | 0.253 | 0.026 | -                            | 0.05  | 0.52  | <0.01 |
| <b>R6</b>                     | 4.4                          | 6.2  | 9.3  | 8.9  | -                            | 0.066 | 0.089 | 0.030 | 0.43                         | <0.01 | 0.12  | 0.03  |
| <b>STREAMS</b>                |                              |      |      |      |                              |       |       |       |                              |       |       |       |
| <b>S1</b>                     | -                            | -    | -    | 1.3  | -                            | -     | -     | 0.036 | -                            | -     | -     | 0.15  |
| <b>S2</b>                     | 0.9                          | 2.2  | 0.9  | 0.4  | -                            | 0.013 | 0.023 | 0.010 | 0.21                         | 0.10  | 0.22  | 0.05  |
| <b>S3</b>                     | -                            | -    | -    | 4.9  | -                            | -     | -     | 0.056 | -                            | -     | -     | 0.12  |
| <b>S4</b>                     | 2.7                          | 3.1  | 4.4  | 4.9  | -                            | 0.056 | 0.039 | 0.039 | 0.18                         | 0.08  | 0.24  | 0.15  |
| <b>S5</b>                     | -                            | -    | -    | 2.2  | -                            | -     | -     | 0.020 | -                            | -     | -     | 0.10  |
| <b>S6</b>                     | 19.5                         | 22.6 | 19.0 | 19.9 | -                            | 0.033 | 0.049 | 0.030 | 0.05                         | 0.08  | 0.03  | 0.03  |
| <b>S7</b>                     | 3.1                          | 1.3  | -    | 1.3  | -                            | 0.148 | 0.023 | 0.000 | 0.63                         | 1.00  | 1.78  | 24.47 |
| <b>S8</b>                     | -                            | -    | -    | 7.1  | -                            | -     | -     | 0.023 | -                            | -     | -     | 0.01  |
| <b>S9</b>                     | 4.0                          | 8.9  | 10.2 | 11.5 | -                            | 0.089 | 0.089 | 0.030 | 0.10                         | <0.01 | 0.05  | 0.03  |
| <b>S10</b>                    | -                            | -    | -    | 1.8  | -                            | -     | -     | 0.013 | -                            | -     | -     | 51.52 |
| <b>S11</b>                    | 0.4                          | 1.8  | -    | 0.9  | -                            | 0.010 | 0.010 | 0.007 | 0.82                         | 0.26  | 0.19  | 0.31  |
| <b>KOZŁOWA GÓRA RESERVOIR</b> |                              |      |      |      |                              |       |       |       |                              |       |       |       |
| <b>Z1</b>                     | 0.9                          | 3.1  | -    | 0.9  | -                            | 0.030 | 0.023 | 0.010 | 0.21                         | 0.08  | 0.05  | 0.01  |
| <b>Z2</b>                     | 0.9                          | 3.5  | -    | 0.9  | -                            | 0.033 | 0.030 | 0.016 | 0.10                         | 0.10  | 0.03  | <0.01 |
| <b>Z3</b>                     | -                            | 2.7  | -    | -    | -                            | 0.023 | 0.020 | -     | -                            | 0.09  | 0.03  | -     |
| <b>GROUNDWATER</b>            |                              |      |      |      |                              |       |       |       |                              |       |       |       |
| <b>W1</b>                     | 22.6                         | 9.3  | 12.0 | 11.1 | -                            | 0.013 | 0.059 | 0.010 | 0.01                         | <0.01 | 0.12  | 0.03  |
| <b>W2</b>                     | 36.7                         | 52.2 | 29.2 | 79.7 | -                            | 0.016 | 0.013 | 0.016 | <0.01                        | <0.01 | <0.01 | 0.30  |
| <b>W3</b>                     | -                            | 21.7 | -    | 16.4 | -                            | 0.069 | 0.240 | 0.099 | -                            | 0.10  | 0.12  | <0.01 |
| <b>W4</b>                     | -                            | 16.4 | 7.5  | 13.7 | -                            | 0.030 | 0.030 | 0.033 | -                            | <0.01 | 0.05  | 0.03  |

**Table S5.** The results of isotopic analyses of S and O in SO<sub>4</sub> in sampled water (Date: I – June 2020; II – January 2021; III – June 2021; IV – September 2021).

| Parameter                     | $\delta^{34}\text{S}_{\text{VCDT}}$ |       |       | $\delta^{18}\text{O}_{\text{VSMOW}}$ |      |       |
|-------------------------------|-------------------------------------|-------|-------|--------------------------------------|------|-------|
| Unit                          | ‰                                   |       |       | ‰                                    |      |       |
| Date                          | I                                   | II    | III   | I                                    | II   | III   |
| <b>BRYNICA RIVER</b>          |                                     |       |       |                                      |      |       |
| R1                            | -                                   | -     | -     | -                                    | -    | -     |
| R2                            | 11.85                               | 6.66  | 9.09  | 13.30                                | 6.69 | 8.21  |
| R3                            | 6.88                                | 7.25  | 7.38  | 6.36                                 | 6.42 | 5.97  |
| R4                            | 5.81                                | 7.04  | 5.30  | 6.11                                 | 6.31 | 4.62  |
| R5                            | -                                   | -     | 5.12  | -                                    | -    | 5.38  |
| R6                            | 4.94                                | 6.27  | 6.48  | 5.15                                 | 5.87 | 4.82  |
| <b>STREAMS</b>                |                                     |       |       |                                      |      |       |
| S1                            | -                                   | -     | -     | -                                    | -    | -     |
| S2                            | -                                   | -     | -     | -                                    | -    | -     |
| S3                            | -                                   | -     | -     | -                                    | -    | -     |
| S4                            | 6.37                                | 7.45  | 7.30  | 8.48                                 | 5.29 | 5.46  |
| S5                            | -                                   | -     | -     | -                                    | -    | -     |
| S6                            | 6.15                                | 5.94  | 6.56  | 6.28                                 | 3.59 | 5.74  |
| S7                            | 8.63                                | 12.28 | 11.16 | 7.45                                 | 9.76 | 11.73 |
| S8                            | -                                   | -     | -     | -                                    | -    | -     |
| S9                            | 4.38                                | 5.63  | 7.36  | 7.70                                 | 6.80 | 4.50  |
| S10                           | -                                   | -     | -     | -                                    | -    | -     |
| S11                           | 13.39                               | 11.74 | 9.14  | 10.61                                | 9.11 | 11.69 |
| <b>KOZŁOWA GÓRA RESERVOIR</b> |                                     |       |       |                                      |      |       |
| Z1                            | 9.38                                | 7.31  | 7.46  | 8.40                                 | 6.43 | 6.43  |
| Z2                            | 9.57                                | 7.12  | 7.42  | 8.66                                 | 7.07 | 6.45  |
| Z3                            | 10.09                               | 4.01  | 7.89  | 10.46                                | 6.41 | 6.77  |
| <b>GROUNDWATER</b>            |                                     |       |       |                                      |      |       |
| W1                            | -                                   | -     | -     | -                                    | -    | -     |
| W2                            | -                                   | -     | -     | -                                    | -    | -     |
| W3                            | 4.87                                | 7.52  | -     | 3.25                                 | 2.69 | -     |
| W4                            | 2.96                                | 5.17  | 5.15  | 5.24                                 | 5.16 | 6.73  |
